# Supplementary material
Source: PubMed Central journal article supplement (PMC4395878)

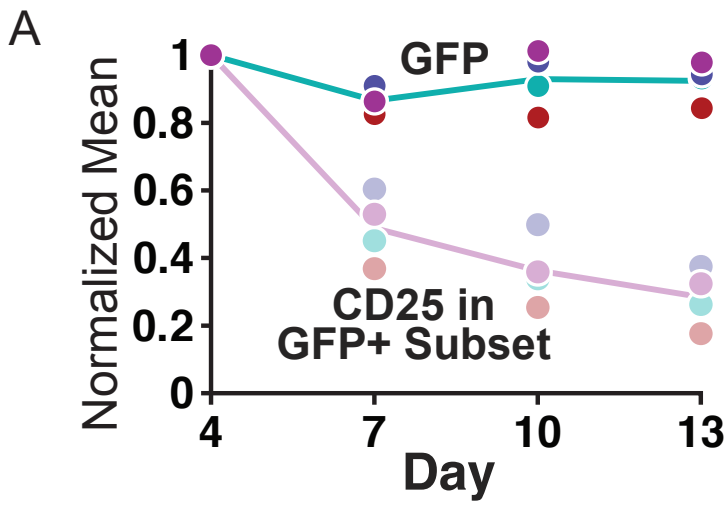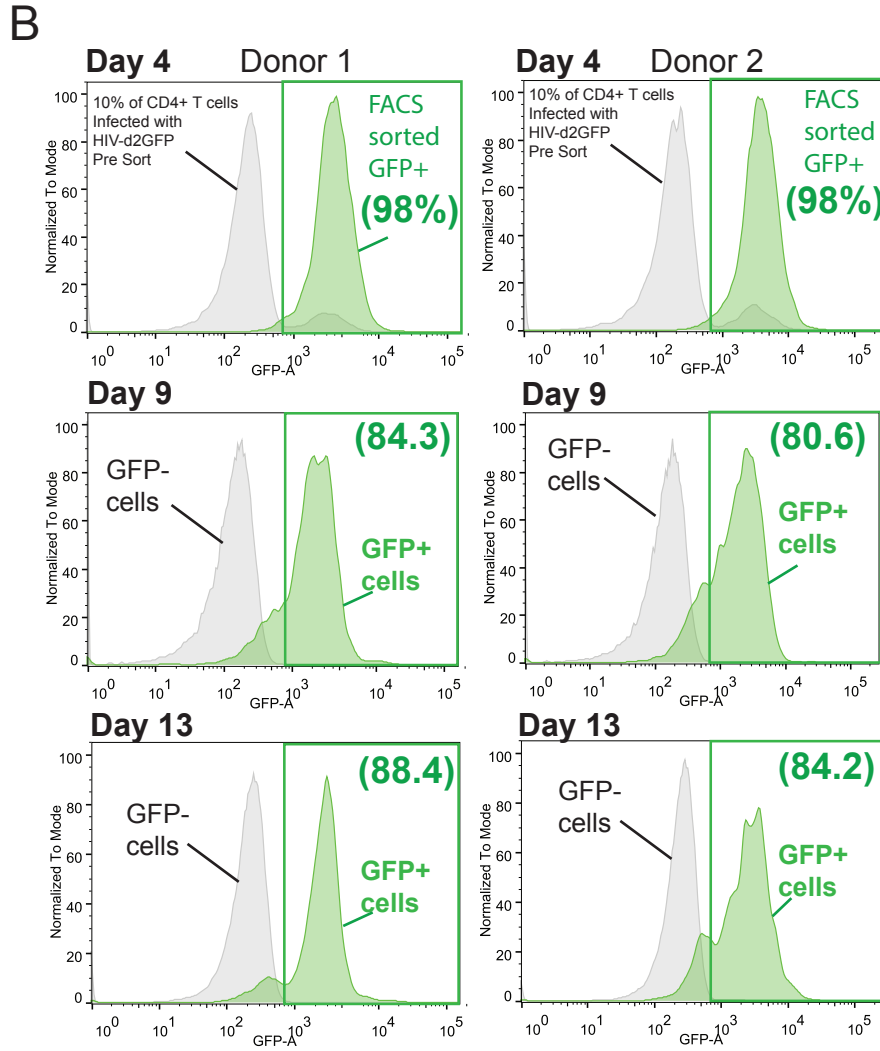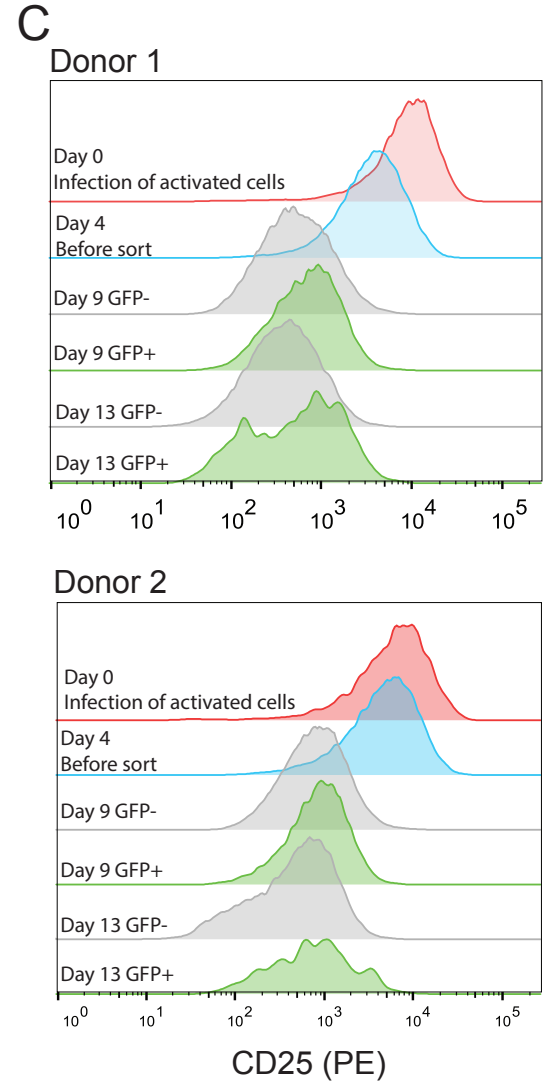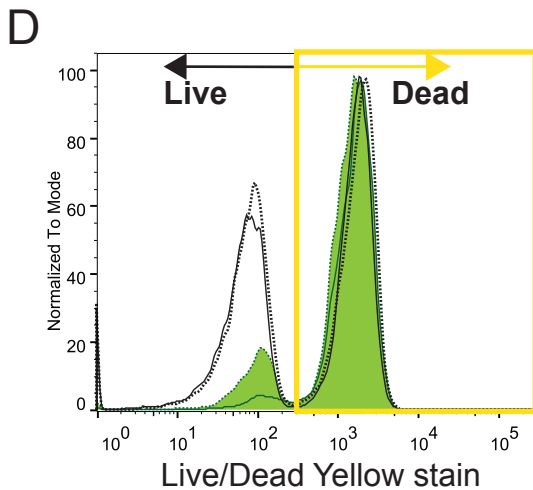

| Source                | % Dead |
|-----------------------|--------|
| Donor 1<br>GFP- cells | 54.3   |
| Donor 2<br>GFP- cells | 54.8   |
| Donor 1<br>GFP+ cells | 94.4   |
| Donor 2<br>GFP+ cells | 83.7   |

Supplement: NIHMS665874-supplement-1.pdf [file NIHMS665874-supplement-1.pdf]

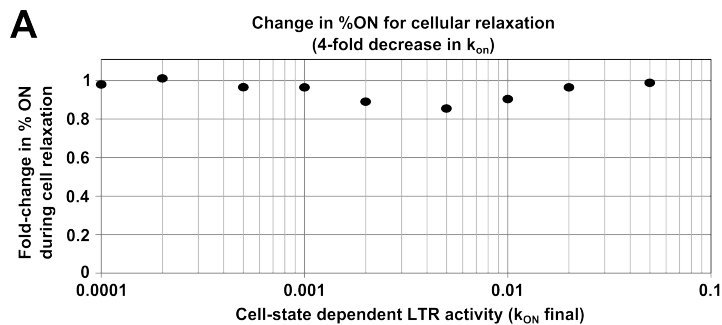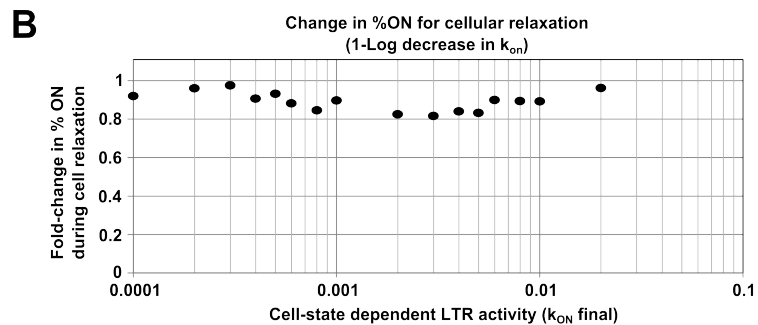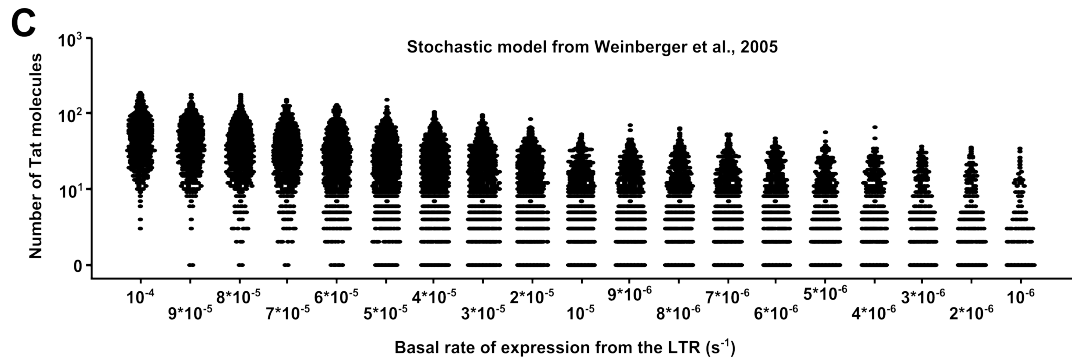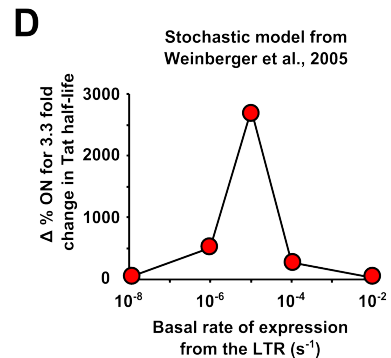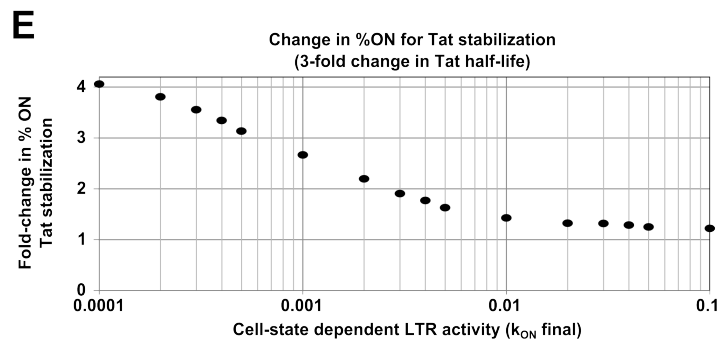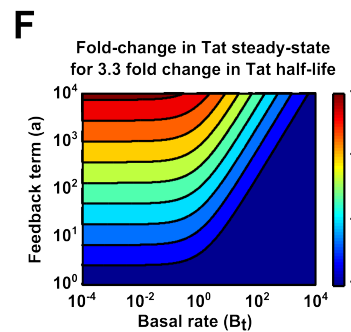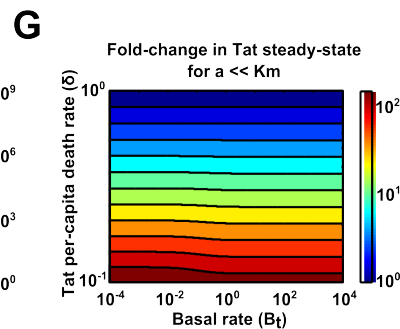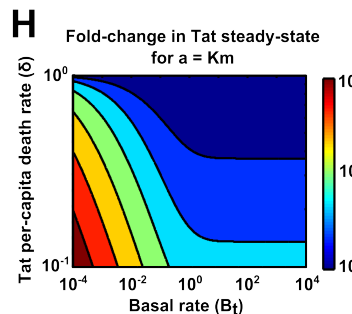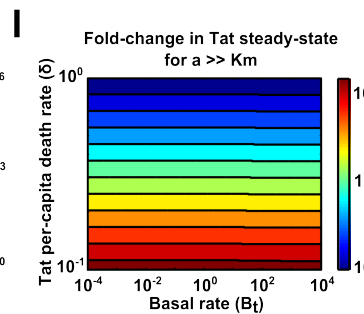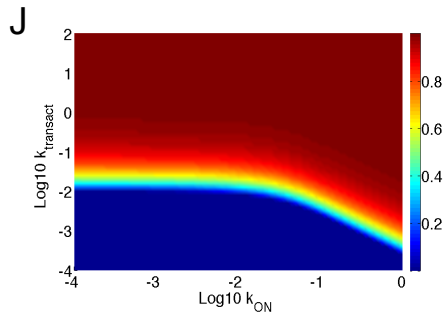

Supplement: NIHMS665874-supplement-2.pdf [file NIHMS665874-supplement-2.pdf]

**A**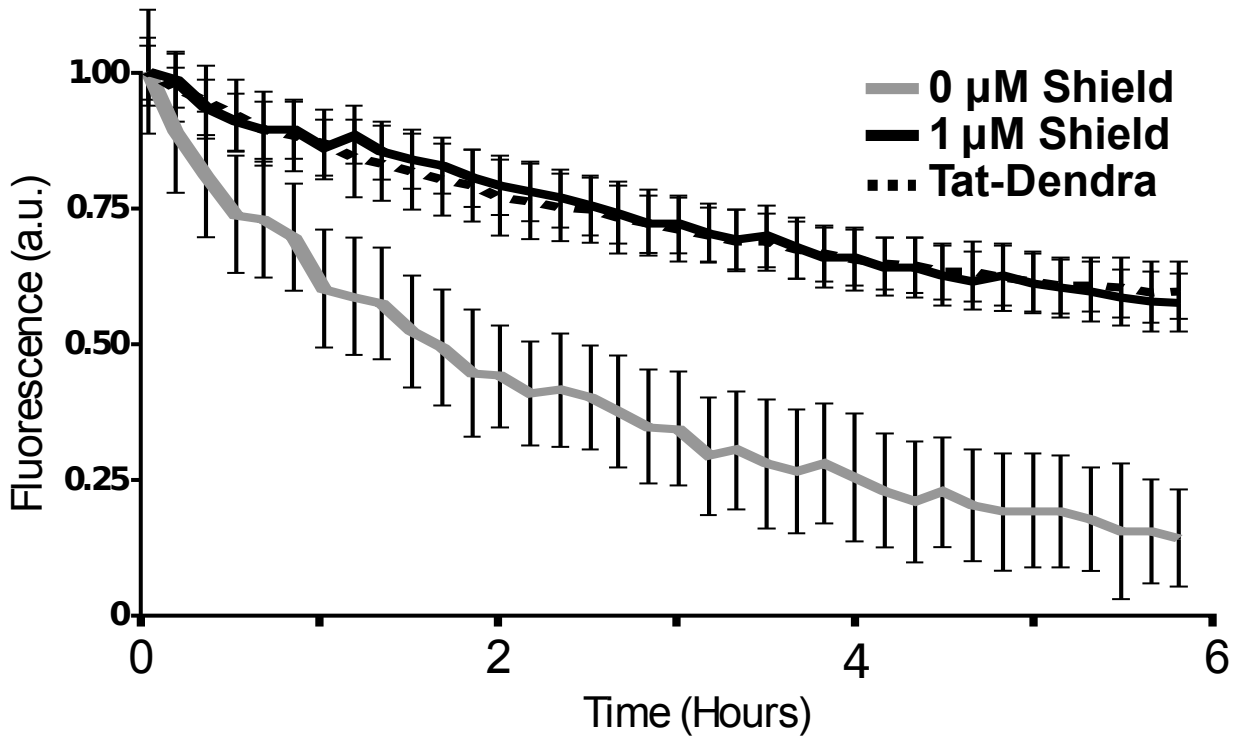**B**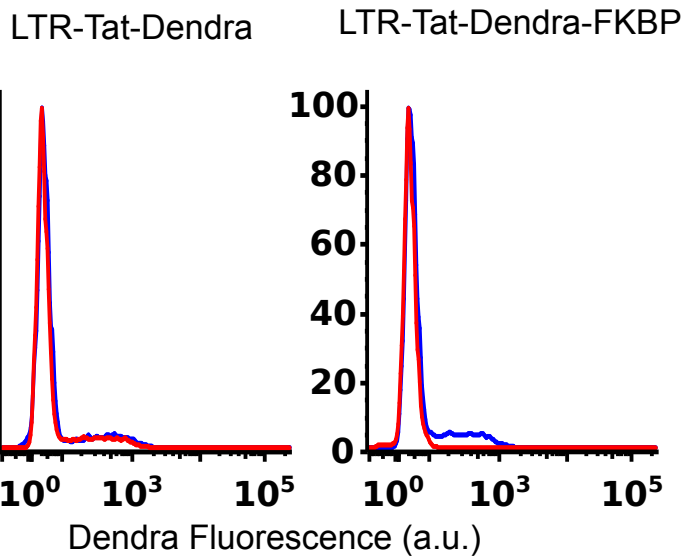**C**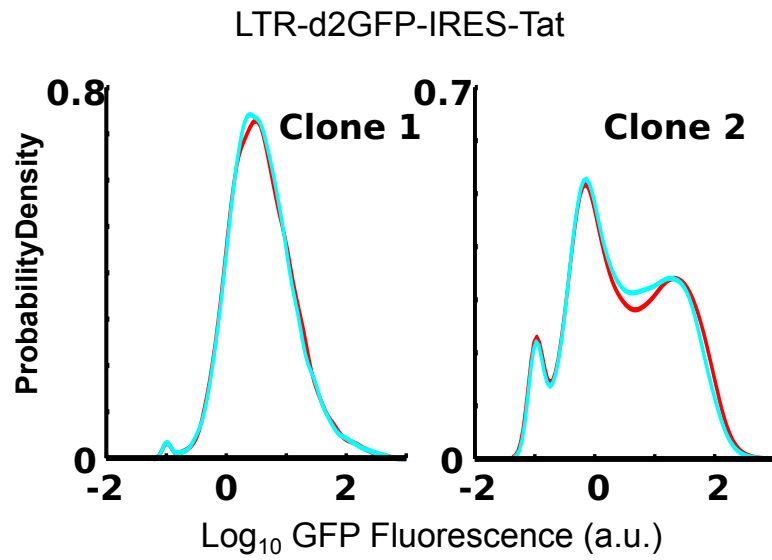

Supplement: NIHMS665874-supplement-3.pdf [file NIHMS665874-supplement-3.pdf]

Probability Density

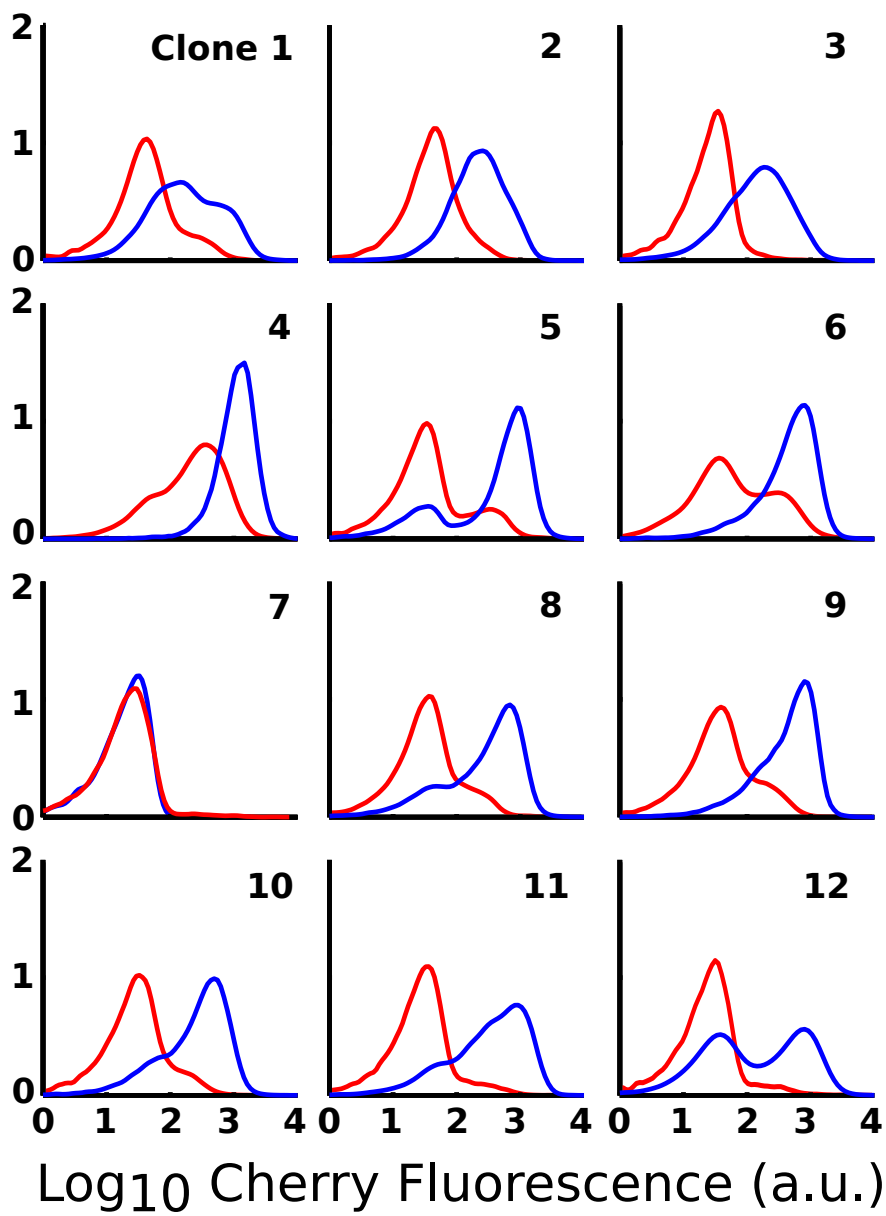

Supplement: NIHMS665874-supplement-4.pdf [file NIHMS665874-supplement-4.pdf]

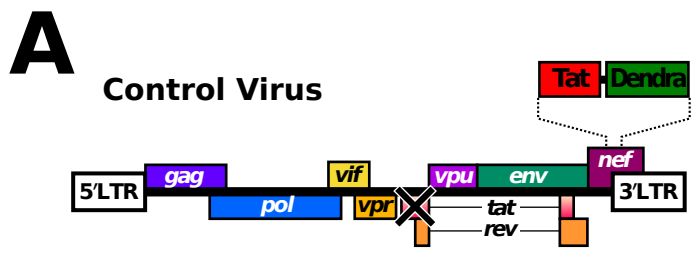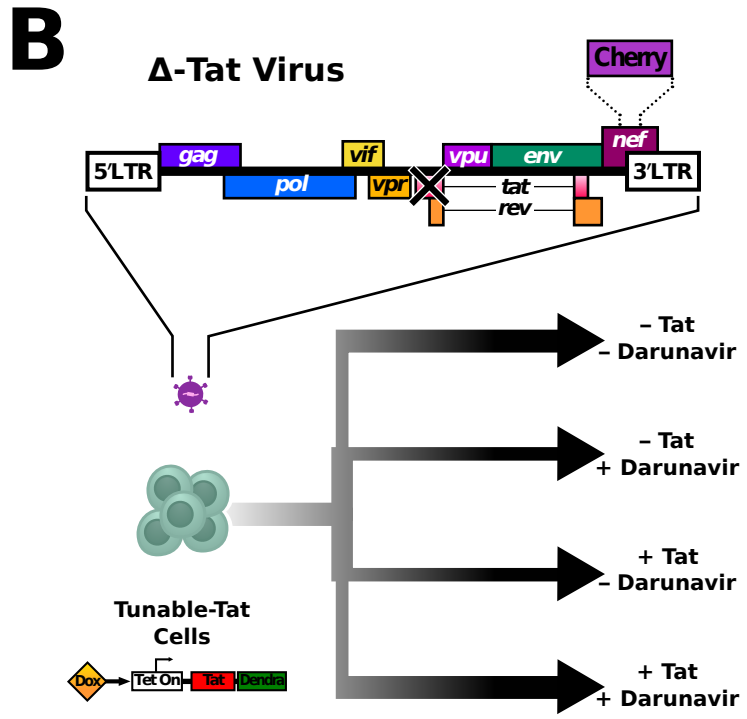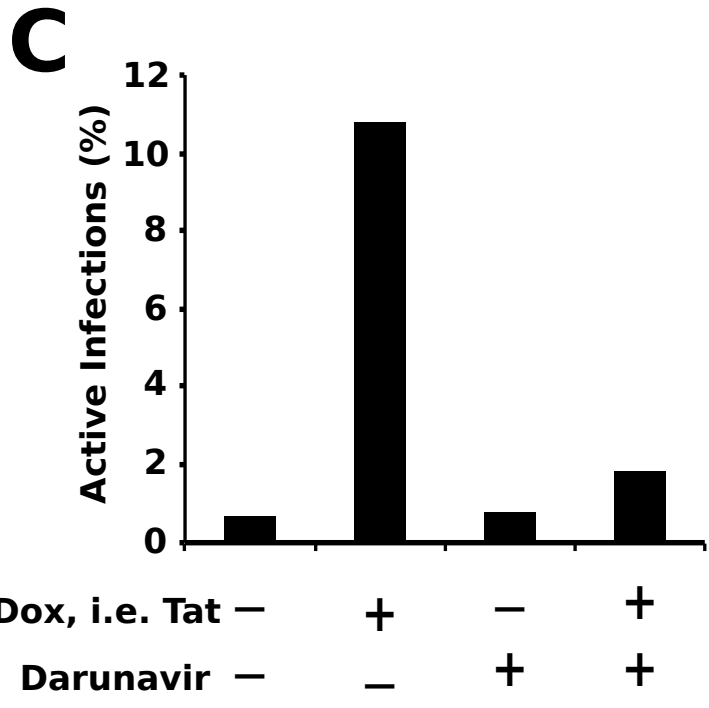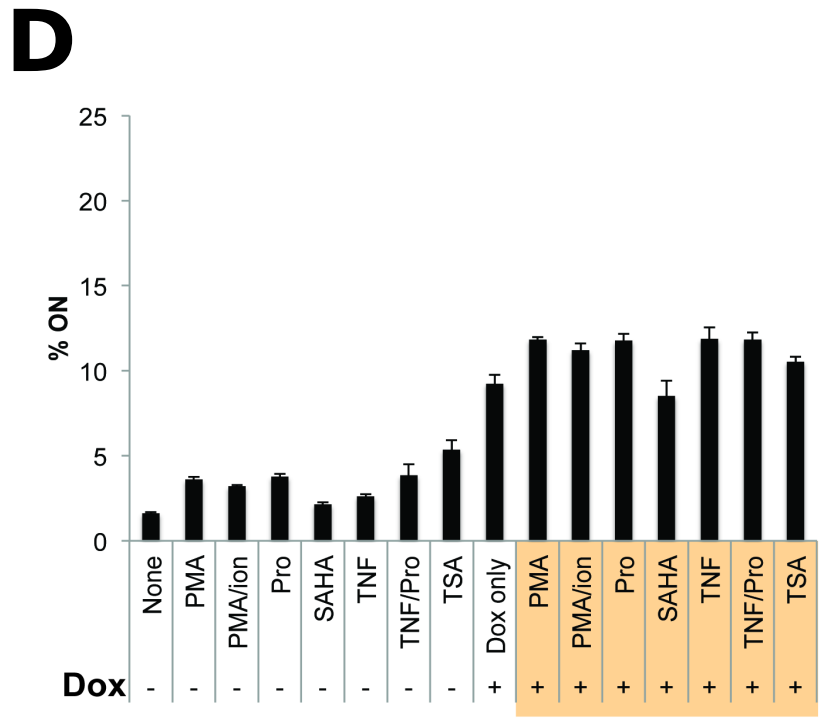

Supplement: NIHMS665874-supplement-5.pdf [file NIHMS665874-supplement-5.pdf]

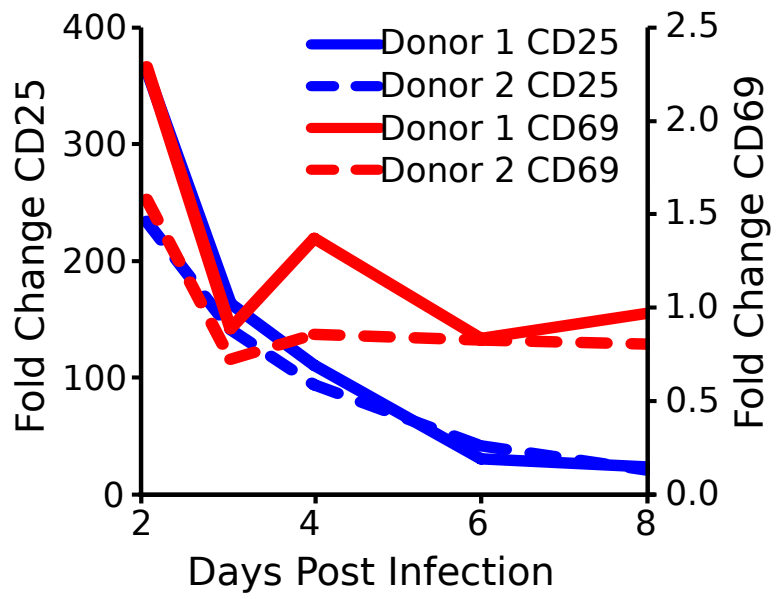

Supplement: NIHMS665874-supplement-6.pdf [file NIHMS665874-supplement-6.pdf]
